# Supplementary material
Source: publisher site journal article supplement (https://www.dovepress.com/get_supplementary_file.php?f=411739.docx)
Supplement: Supplementary file 1 [file get_supplementary_file.php]

# Supplementary tables

**Table S1.** Numerator, Denominator, and Prevalence of COPD using different COPD definitions from 2000 to 2019.

| **Year** | **Validated COPD [Definition 1]** | | | **QOF COPD [Definition 2]** | | | **Smoker with symptoms, inhaler, no asthma [Definition 3]** | | | **Smoker with symptoms, inhaler, no asthma w/o validated COPD [Definition 3 minus Definition 1]** | | | **HES COPD (any position) [Definition 4]** | | | **HES COPD (1st / 2nd position) [Definition 5]** | | | **HES COPD (any) w/o validated COPD [Definition 4 minus Definition 1]** | | | **HES COPD (1st / 2nd) w/o validated COPD [Definition 5 minus Definition 1]** | | |
| --- | --- | --- | --- | --- | --- | --- | --- | --- | --- | --- | --- | --- | --- | --- | --- | --- | --- | --- | --- | --- | --- | --- | --- | --- |
| Numerator | Denominator | Prevalence (%) | Numerator | Denominator | Prevalence (%) | Numerator | Denominator | Prevalence (%) | Numerator | Denominator | Prevalence (%) | Numerator | Denominator | Prevalence (%) | Numerator | Denominator | Prevalence (%) | Numerator | Denominator | Prevalence (%) | Numerator | Denominator | Prevalence (%) |
| **2000** | 69,711 | 4,373,538 | 1.59 | 73,799 | 4,373,538 | 1.69 | 13,555 | 4,373,538 | 0.31 | 7,777 | 4,373,538 | 0.18 | 35,816 | 4,373,538 | 0.82 | 25,749 | 4,373,538 | 0.59 | 19,141 | 4,373,538 | 0.44 | 12,501 | 4,373,538 | 0.29 |
| **2001** | 80,369 | 4,518,781 | 1.78 | 84,542 | 4,518,781 | 1.87 | 18,304 | 4,518,781 | 0.41 | 10,497 | 4,518,781 | 0.23 | 43,235 | 4,518,781 | 0.96 | 30,854 | 4,518,781 | 0.68 | 20,939 | 4,518,781 | 0.46 | 13,259 | 4,518,781 | 0.29 |
| **2002** | 90,479 | 4,632,781 | 1.95 | 94,388 | 4,632,781 | 2.04 | 24,059 | 4,632,781 | 0.52 | 13,686 | 4,632,781 | 0.30 | 49,896 | 4,632,781 | 1.08 | 35,059 | 4,632,781 | 0.76 | 22,337 | 4,632,781 | 0.48 | 13,573 | 4,632,781 | 0.29 |
| **2003** | 101,602 | 4,754,059 | 2.14 | 104,601 | 4,754,059 | 2.20 | 31,257 | 4,754,059 | 0.66 | 17,453 | 4,754,059 | 0.37 | 56,478 | 4,754,059 | 1.19 | 39,290 | 4,754,059 | 0.83 | 23,422 | 4,754,059 | 0.49 | 13,759 | 4,754,059 | 0.29 |
| **2004** | 114,423 | 4,857,026 | 2.36 | 115,016 | 4,857,026 | 2.37 | 39,596 | 4,857,026 | 0.82 | 21,096 | 4,857,026 | 0.43 | 62,997 | 4,857,026 | 1.30 | 43,584 | 4,857,026 | 0.90 | 24,338 | 4,857,026 | 0.50 | 13,820 | 4,857,026 | 0.28 |
| **2005** | 130,981 | 4,948,299 | 2.65 | 127,164 | 4,948,299 | 2.57 | 49,479 | 4,948,299 | 1.00 | 25,339 | 4,948,299 | 0.51 | 70,166 | 4,948,299 | 1.42 | 48,293 | 4,948,299 | 0.98 | 25,317 | 4,948,299 | 0.51 | 14,133 | 4,948,299 | 0.29 |
| **2006** | 144,931 | 5,043,840 | 2.87 | 137,714 | 5,043,840 | 2.73 | 59,685 | 5,043,840 | 1.18 | 29,908 | 5,043,840 | 0.59 | 77,622 | 5,043,840 | 1.54 | 52,280 | 5,043,840 | 1.04 | 26,835 | 5,043,840 | 0.53 | 14,542 | 5,043,840 | 0.29 |
| **2007** | 158,285 | 5,134,952 | 3.08 | 147,698 | 5,134,952 | 2.88 | 70,384 | 5,134,952 | 1.37 | 34,702 | 5,134,952 | 0.68 | 85,155 | 5,134,952 | 1.66 | 56,315 | 5,134,952 | 1.10 | 28,361 | 5,134,952 | 0.55 | 14,946 | 5,134,952 | 0.29 |
| **2008** | 170,965 | 5,238,538 | 3.26 | 157,612 | 5,238,538 | 3.01 | 83,255 | 5,238,538 | 1.59 | 40,497 | 5,238,538 | 0.77 | 93,313 | 5,238,538 | 1.78 | 60,332 | 5,238,538 | 1.15 | 30,370 | 5,238,538 | 0.58 | 15,604 | 5,238,538 | 0.30 |
| **2009** | 183,559 | 5,340,210 | 3.44 | 166,771 | 5,340,210 | 3.12 | 99,768 | 5,340,210 | 1.87 | 48,402 | 5,340,210 | 0.91 | 102,609 | 5,340,210 | 1.92 | 65,218 | 5,340,210 | 1.22 | 32,813 | 5,340,210 | 0.61 | 16,483 | 5,340,210 | 0.31 |
| **2010** | 195,425 | 5,415,934 | 3.61 | 173,872 | 5,415,934 | 3.21 | 119,727 | 5,415,934 | 2.21 | 56,658 | 5,415,934 | 1.05 | 112,700 | 5,415,934 | 2.08 | 69,837 | 5,415,934 | 1.29 | 35,369 | 5,415,934 | 0.65 | 17,177 | 5,415,934 | 0.32 |
| **2011** | 207,334 | 5,489,639 | 3.78 | 182,465 | 5,489,639 | 3.32 | 135,635 | 5,489,639 | 2.47 | 64,513 | 5,489,639 | 1.18 | 124,261 | 5,489,639 | 2.26 | 75,829 | 5,489,639 | 1.38 | 38,650 | 5,489,639 | 0.70 | 18,337 | 5,489,639 | 0.33 |
| **2012** | 217,443 | 5,574,194 | 3.90 | 190,183 | 5,574,194 | 3.41 | 150,736 | 5,574,194 | 2.70 | 72,374 | 5,574,194 | 1.30 | 135,162 | 5,574,194 | 2.42 | 80,976 | 5,574,194 | 1.45 | 41,856 | 5,574,194 | 0.75 | 19,268 | 5,574,194 | 0.35 |
| **2013** | 226,751 | 5,615,499 | 4.04 | 197,091 | 5,615,499 | 3.51 | 165,033 | 5,615,499 | 2.94 | 80,355 | 5,615,499 | 1.43 | 144,887 | 5,615,499 | 2.58 | 85,652 | 5,615,499 | 1.53 | 44,160 | 5,615,499 | 0.79 | 19,805 | 5,615,499 | 0.35 |
| **2014** | 234,786 | 5,674,357 | 4.14 | 203,644 | 5,674,357 | 3.59 | 177,830 | 5,674,357 | 3.13 | 87,326 | 5,674,357 | 1.54 | 156,143 | 5,674,357 | 2.75 | 91,074 | 5,674,357 | 1.61 | 47,185 | 5,674,357 | 0.83 | 20,713 | 5,674,357 | 0.37 |
| **2015** | 243,075 | 5,794,004 | 4.20 | 211,195 | 5,794,004 | 3.65 | 191,297 | 5,794,004 | 3.30 | 94,478 | 5,794,004 | 1.63 | 167,770 | 5,794,004 | 2.90 | 97,601 | 5,794,004 | 1.68 | 50,799 | 5,794,004 | 0.88 | 22,027 | 5,794,004 | 0.38 |
| **2016** | 252,388 | 5,925,074 | 4.26 | 220,040 | 5,925,074 | 3.71 | 204,069 | 5,925,074 | 3.44 | 100,488 | 5,925,074 | 1.70 | 180,794 | 5,925,074 | 3.05 | 104,761 | 5,925,074 | 1.77 | 54,589 | 5,925,074 | 0.92 | 23,364 | 5,925,074 | 0.39 |
| **2017** | 262,078 | 6,043,281 | 4.34 | 228,212 | 6,043,281 | 3.78 | 217,158 | 6,043,281 | 3.59 | 106,788 | 6,043,281 | 1.77 | 193,184 | 6,043,281 | 3.20 | 111,550 | 6,043,281 | 1.85 | 58,157 | 6,043,281 | 0.96 | 24,565 | 6,043,281 | 0.41 |
| **2018** | 270,596 | 6,151,681 | 4.40 | 235,670 | 6,151,681 | 3.83 | 230,157 | 6,151,681 | 3.74 | 113,231 | 6,151,681 | 1.84 | 205,061 | 6,151,681 | 3.33 | 117,935 | 6,151,681 | 1.92 | 61,726 | 6,151,681 | 1.00 | 25,607 | 6,151,681 | 0.42 |
| **2019** | 275,171 | 6,159,496 | 4.47 | 238,613 | 6,159,496 | 3.87 | 237,146 | 6,159,496 | 3.85 | 116,976 | 6,159,496 | 1.90 | 214,868 | 6,159,496 | 3.49 | 123,290 | 6,159,496 | 2.00 | 64,519 | 6,159,496 | 1.05 | 26,498 | 6,159,496 | 0.43 |

**Table S1** cont.

| **Year** | **Validated OR HES (any) COPD [Definition 1 OR Definition 4]** | | | **Validated OR HES (1st / 2nd) COPD [Definition 1 OR Definition 5]** | | | **QOF OR HES (any) COPD [Definition 2 OR Definition 4]** | | | **Validated OR HES (any) OR smoker with symptoms, inhaler, no asthma [Definition 1 OR Definition 4 OR Definition 3]** | | | **Validated OR HES (1st / 2nd) OR smoker with symptoms, inhaler, no asthma [Definition 1 OR Definition 5 OR Definition 3]** | | |
| --- | --- | --- | --- | --- | --- | --- | --- | --- | --- | --- | --- | --- | --- | --- | --- |
| Numerator | Denominator | Prevalence (%) | Numerator | Denominator | Prevalence (%) | Numerator | Denominator | Prevalence (%) | Numerator | Denominator | Prevalence (%) | Numerator | Denominator | Prevalence (%) |
| **2000** | 88,852 | 4,373,538 | 2.03 | 82,212 | 4,373,538 | 1.88 | 92,107 | 4,373,538 | 2.11 | 96,186 | 4,373,538 | 2.20 | 89,685 | 4,373,538 | 2.05 |
| **2001** | 101,308 | 4,518,781 | 2.24 | 93,628 | 4,518,781 | 2.07 | 104,489 | 4,518,781 | 2.31 | 111,132 | 4,518,781 | 2.46 | 103,683 | 4,518,781 | 2.29 |
| **2002** | 112,816 | 4,632,781 | 2.44 | 104,052 | 4,632,781 | 2.25 | 115,664 | 4,632,781 | 2.50 | 125,615 | 4,632,781 | 2.71 | 117,195 | 4,632,781 | 2.53 |
| **2003** | 125,024 | 4,754,059 | 2.63 | 115,361 | 4,754,059 | 2.43 | 127,045 | 4,754,059 | 2.67 | 141,342 | 4,754,059 | 2.97 | 132,141 | 4,754,059 | 2.78 |
| **2004** | 138,761 | 4,857,026 | 2.86 | 128,243 | 4,857,026 | 2.64 | 138,766 | 4,857,026 | 2.86 | 158,477 | 4,857,026 | 3.26 | 148,524 | 4,857,026 | 3.06 |
| **2005** | 156,298 | 4,948,299 | 3.16 | 145,114 | 4,948,299 | 2.93 | 152,535 | 4,948,299 | 3.08 | 180,052 | 4,948,299 | 3.64 | 169,524 | 4,948,299 | 3.43 |
| **2006** | 171,766 | 5,043,840 | 3.41 | 159,473 | 5,043,840 | 3.16 | 165,090 | 5,043,840 | 3.27 | 199,853 | 5,043,840 | 3.96 | 188,353 | 5,043,840 | 3.73 |
| **2007** | 186,646 | 5,134,952 | 3.63 | 173,231 | 5,134,952 | 3.37 | 177,110 | 5,134,952 | 3.45 | 219,273 | 5,134,952 | 4.27 | 206,774 | 5,134,952 | 4.03 |
| **2008** | 201,335 | 5,238,538 | 3.84 | 186,569 | 5,238,538 | 3.56 | 189,455 | 5,238,538 | 3.62 | 239,494 | 5,238,538 | 4.57 | 225,788 | 5,238,538 | 4.31 |
| **2009** | 216,372 | 5,340,210 | 4.05 | 200,042 | 5,340,210 | 3.75 | 201,601 | 5,340,210 | 3.78 | 262,027 | 5,340,210 | 4.91 | 246,960 | 5,340,210 | 4.62 |
| **2010** | 230,794 | 5,415,934 | 4.26 | 212,602 | 5,415,934 | 3.93 | 212,012 | 5,415,934 | 3.91 | 284,227 | 5,415,934 | 5.25 | 267,568 | 5,415,934 | 4.94 |
| **2011** | 245,984 | 5,489,639 | 4.48 | 225,671 | 5,489,639 | 4.11 | 224,383 | 5,489,639 | 4.09 | 306,897 | 5,489,639 | 5.59 | 288,376 | 5,489,639 | 5.25 |
| **2012** | 259,299 | 5,574,194 | 4.65 | 236,711 | 5,574,194 | 4.25 | 235,717 | 5,574,194 | 4.23 | 327,578 | 5,574,194 | 5.88 | 307,063 | 5,574,194 | 5.51 |
| **2013** | 270,911 | 5,615,499 | 4.82 | 246,556 | 5,615,499 | 4.39 | 245,187 | 5,615,499 | 4.37 | 346,632 | 5,615,499 | 6.17 | 324,628 | 5,615,499 | 5.78 |
| **2014** | 281,971 | 5,674,357 | 4.97 | 255,499 | 5,674,357 | 4.50 | 255,135 | 5,674,357 | 4.50 | 364,223 | 5,674,357 | 6.42 | 340,399 | 5,674,357 | 6.00 |
| **2015** | 293,874 | 5,794,004 | 5.07 | 265,102 | 5,794,004 | 4.58 | 266,384 | 5,794,004 | 4.60 | 382,778 | 5,794,004 | 6.61 | 356,877 | 5,794,004 | 6.16 |
| **2016** | 306,977 | 5,925,074 | 5.18 | 275,752 | 5,925,074 | 4.65 | 279,150 | 5,925,074 | 4.71 | 401,421 | 5,925,074 | 6.77 | 373,354 | 5,925,074 | 6.30 |
| **2017** | 320,235 | 6,043,281 | 5.30 | 286,643 | 6,043,281 | 4.74 | 290,991 | 6,043,281 | 4.82 | 420,545 | 6,043,281 | 6.96 | 390,391 | 6,043,281 | 6.46 |
| **2018** | 332,322 | 6,151,681 | 5.40 | 296,203 | 6,151,681 | 4.81 | 302,154 | 6,151,681 | 4.91 | 438,701 | 6,151,681 | 7.13 | 406,259 | 6,151,681 | 6.60 |
| **2019** | 339,690 | 6,159,496 | 5.51 | 301,669 | 6,159,496 | 4.90 | 307,810 | 6,159,496 | 5.00 | 449,495 | 6,159,496 | 7.30 | 415,354 | 6,159,496 | 6.74 |

**Table S2.** Prevalence of COPD stratified by gender. First column shows whole cohort COPD definition used.

| **Year** | **Validated OR HES (1st / 2nd) COPD [Definition 1 OR Definition 5]** | | | **Gender: Male** | | | **Gender: Female** | | |
| --- | --- | --- | --- | --- | --- | --- | --- | --- | --- |
| Numerator | Denominator | Prevalence (%) | Numerator | Denominator | Prevalence (%) | Numerator | Denominator | Prevalence (%) |
| **2000** | 82,212 | 4,373,538 | 1.88 | 44,796 | 2,116,799 | 2.12 | 37,416 | 2,256,739 | 1.66 |
| **2001** | 93,628 | 4,518,781 | 2.07 | 50,515 | 2,193,016 | 2.30 | 43,113 | 2,325,765 | 1.85 |
| **2002** | 104,052 | 4,632,781 | 2.25 | 55,723 | 2,255,355 | 2.47 | 48,329 | 2,377,426 | 2.03 |
| **2003** | 115,361 | 4,754,059 | 2.43 | 61,411 | 2,320,247 | 2.65 | 53,950 | 2,433,812 | 2.22 |
| **2004** | 128,243 | 4,857,026 | 2.64 | 67,804 | 2,377,087 | 2.85 | 60,439 | 2,479,939 | 2.44 |
| **2005** | 145,114 | 4,948,299 | 2.93 | 76,103 | 2,422,956 | 3.14 | 69,011 | 2,525,343 | 2.73 |
| **2006** | 159,473 | 5,043,840 | 3.16 | 83,122 | 2,472,543 | 3.36 | 76,351 | 2,571,297 | 2.97 |
| **2007** | 173,231 | 5,134,952 | 3.37 | 90,012 | 2,519,705 | 3.57 | 83,219 | 2,615,247 | 3.18 |
| **2008** | 186,569 | 5,238,538 | 3.56 | 96,528 | 2,572,872 | 3.75 | 90,041 | 2,665,666 | 3.38 |
| **2009** | 200,042 | 5,340,210 | 3.75 | 103,091 | 2,623,483 | 3.93 | 96,951 | 2,716,727 | 3.57 |
| **2010** | 212,602 | 5,415,934 | 3.93 | 109,294 | 2,661,549 | 4.11 | 103,308 | 2,754,385 | 3.75 |
| **2011** | 225,671 | 5,489,639 | 4.11 | 115,559 | 2,692,422 | 4.29 | 110,112 | 2,797,217 | 3.94 |
| **2012** | 236,711 | 5,574,194 | 4.25 | 120,997 | 2,734,266 | 4.43 | 115,714 | 2,839,928 | 4.07 |
| **2013** | 246,556 | 5,615,499 | 4.39 | 126,089 | 2,752,003 | 4.58 | 120,467 | 2,863,496 | 4.21 |
| **2014** | 255,499 | 5,674,357 | 4.50 | 130,477 | 2,786,502 | 4.68 | 125,022 | 2,887,855 | 4.33 |
| **2015** | 265,102 | 5,794,004 | 4.58 | 135,162 | 2,848,715 | 4.74 | 129,940 | 2,945,289 | 4.41 |
| **2016** | 275,752 | 5,925,074 | 4.65 | 140,327 | 2,915,720 | 4.81 | 135,425 | 3,009,354 | 4.50 |
| **2017** | 286,643 | 6,043,281 | 4.74 | 145,570 | 2,980,162 | 4.88 | 141,073 | 3,063,119 | 4.61 |
| **2018** | 296,203 | 6,151,681 | 4.81 | 150,275 | 3,039,476 | 4.94 | 145,928 | 3,112,205 | 4.69 |
| **2019** | 301,669 | 6,159,496 | 4.90 | 153,268 | 3,047,932 | 5.03 | 148,401 | 3,111,564 | 4.77 |

**Table S3.** Prevalence of potentially undiagnosed COPD stratified by gender. First column shows whole cohort COPD definition used.

| **Year** | **Smoker with symptoms, inhaler, no asthma w/o validated COPD [Definition 3 minus Definition 1]** | | | **Gender: Male** | | | **Gender: Female** | | |
| --- | --- | --- | --- | --- | --- | --- | --- | --- | --- |
| Numerator | Denominator | Prevalence (%) | Numerator | Denominator | Prevalence (%) | Numerator | Denominator | Prevalence (%) |
| **2000** | 7,777 | 4,373,538 | 0.18 | 3,398 | 2,116,799 | 0.16 | 4,379 | 2,256,739 | 0.19 |
| **2001** | 10,497 | 4,518,781 | 0.23 | 4,530 | 2,193,016 | 0.21 | 5,967 | 2,325,765 | 0.26 |
| **2002** | 13,686 | 4,632,781 | 0.30 | 5,824 | 2,255,355 | 0.26 | 7,862 | 2,377,426 | 0.33 |
| **2003** | 17,453 | 4,754,059 | 0.37 | 7,452 | 2,320,247 | 0.32 | 10,001 | 2,433,812 | 0.41 |
| **2004** | 21,096 | 4,857,026 | 0.43 | 9,005 | 2,377,087 | 0.38 | 12,091 | 2,479,939 | 0.49 |
| **2005** | 25,339 | 4,948,299 | 0.51 | 10,787 | 2,422,956 | 0.45 | 14,552 | 2,525,343 | 0.58 |
| **2006** | 29,908 | 5,043,840 | 0.59 | 12,726 | 2,472,543 | 0.51 | 17,182 | 2,571,297 | 0.67 |
| **2007** | 34,702 | 5,134,952 | 0.68 | 14,624 | 2,519,705 | 0.58 | 20,078 | 2,615,247 | 0.77 |
| **2008** | 40,497 | 5,238,538 | 0.77 | 17,088 | 2,572,872 | 0.66 | 23,409 | 2,665,666 | 0.88 |
| **2009** | 48,402 | 5,340,210 | 0.91 | 20,467 | 2,623,483 | 0.78 | 27,935 | 2,716,727 | 1.03 |
| **2010** | 56,658 | 5,415,934 | 1.05 | 24,010 | 2,661,549 | 0.90 | 32,648 | 2,754,385 | 1.19 |
| **2011** | 64,513 | 5,489,639 | 1.18 | 27,186 | 2,692,422 | 1.01 | 37,327 | 2,797,217 | 1.33 |
| **2012** | 72,374 | 5,574,194 | 1.30 | 30,503 | 2,734,266 | 1.12 | 41,871 | 2,839,928 | 1.47 |
| **2013** | 80,355 | 5,615,499 | 1.43 | 33,845 | 2,752,003 | 1.23 | 46,510 | 2,863,496 | 1.62 |
| **2014** | 87,326 | 5,674,357 | 1.54 | 36,808 | 2,786,502 | 1.32 | 50,518 | 2,887,855 | 1.75 |
| **2015** | 94,478 | 5,794,004 | 1.63 | 39,744 | 2,848,715 | 1.40 | 54,734 | 2,945,289 | 1.86 |
| **2016** | 100,488 | 5,925,074 | 1.70 | 42,203 | 2,915,720 | 1.45 | 58,285 | 3,009,354 | 1.94 |
| **2017** | 106,788 | 6,043,281 | 1.77 | 44,841 | 2,980,162 | 1.50 | 61,947 | 3,063,119 | 2.02 |
| **2018** | 113,231 | 6,151,681 | 1.84 | 47,349 | 3,039,476 | 1.56 | 65,882 | 3,112,205 | 2.12 |
| **2019** | 116,976 | 6,159,496 | 1.90 | 48,610 | 3,047,932 | 1.59 | 68,366 | 3,111,564 | 2.20 |

**Table S4.** Prevalence of COPD stratified by age. First column shows whole cohort COPD definition used.

| **Year** | **Validated OR HES (1st / 2nd) COPD [Definition 1 OR Definition 5]** | | | **Age: 40-49 years** | | | **Age: 50-59 years** | | | **Age: 60-69 years** | | | **Age: 70-79 years** | | | **Age: 80+ years** | | |
| --- | --- | --- | --- | --- | --- | --- | --- | --- | --- | --- | --- | --- | --- | --- | --- | --- | --- | --- |
| Numerator | Denominator | Prevalence (%) | Numerator | Denominator | Prevalence (%) | Numerator | Denominator | Prevalence (%) | Numerator | Denominator | Prevalence (%) | Numerator | Denominator | Prevalence (%) | Numerator | Denominator | Prevalence (%) |
| **2000** | 82,212 | 4,373,538 | 1.88 | 2,154 | 1,246,120 | 0.17 | 11,151 | 1,152,809 | 0.97 | 23,120 | 864,376 | 2.67 | 31,181 | 699,669 | 4.46 | 14,606 | 410,564 | 3.56 |
| **2001** | 93,628 | 4,518,781 | 2.07 | 2,349 | 1,301,536 | 0.18 | 12,635 | 1,196,128 | 1.06 | 25,613 | 878,559 | 2.92 | 35,088 | 707,700 | 4.96 | 17,943 | 434,858 | 4.13 |
| **2002** | 104,052 | 4,632,781 | 2.25 | 2,593 | 1,351,608 | 0.19 | 13,933 | 1,221,139 | 1.14 | 28,040 | 897,067 | 3.13 | 38,384 | 712,606 | 5.39 | 21,102 | 450,361 | 4.69 |
| **2003** | 115,361 | 4,754,059 | 2.43 | 2,945 | 1,404,646 | 0.21 | 15,390 | 1,243,359 | 1.24 | 31,185 | 925,430 | 3.37 | 41,571 | 716,305 | 5.80 | 24,270 | 464,319 | 5.23 |
| **2004** | 128,243 | 4,857,026 | 2.64 | 3,387 | 1,459,507 | 0.23 | 16,886 | 1,252,314 | 1.35 | 35,092 | 954,578 | 3.68 | 45,262 | 719,312 | 6.29 | 27,616 | 471,315 | 5.86 |
| **2005** | 145,114 | 4,948,299 | 2.93 | 4,296 | 1,507,832 | 0.28 | 19,297 | 1,268,816 | 1.52 | 39,964 | 972,242 | 4.11 | 49,971 | 722,428 | 6.92 | 31,586 | 476,981 | 6.62 |
| **2006** | 159,473 | 5,043,840 | 3.16 | 4,977 | 1,549,925 | 0.32 | 21,021 | 1,269,522 | 1.66 | 44,352 | 1,009,105 | 4.40 | 53,806 | 728,474 | 7.39 | 35,317 | 486,814 | 7.25 |
| **2007** | 173,231 | 5,134,952 | 3.37 | 5,611 | 1,584,668 | 0.35 | 22,059 | 1,260,560 | 1.75 | 48,752 | 1,056,042 | 4.62 | 57,741 | 737,818 | 7.83 | 39,068 | 495,864 | 7.88 |
| **2008** | 186,569 | 5,238,538 | 3.56 | 6,170 | 1,620,295 | 0.38 | 23,292 | 1,273,941 | 1.83 | 52,699 | 1,089,120 | 4.84 | 61,415 | 748,508 | 8.20 | 42,993 | 506,674 | 8.49 |
| **2009** | 200,042 | 5,340,210 | 3.75 | 6,846 | 1,653,172 | 0.41 | 24,863 | 1,296,783 | 1.92 | 56,401 | 1,116,984 | 5.05 | 65,217 | 758,190 | 8.60 | 46,715 | 515,081 | 9.07 |
| **2010** | 212,602 | 5,415,934 | 3.93 | 7,761 | 1,669,968 | 0.46 | 26,512 | 1,325,464 | 2.00 | 60,438 | 1,137,506 | 5.31 | 67,697 | 758,555 | 8.92 | 50,194 | 524,441 | 9.57 |
| **2011** | 225,671 | 5,489,639 | 4.11 | 8,496 | 1,677,590 | 0.51 | 28,911 | 1,357,282 | 2.13 | 64,406 | 1,159,205 | 5.56 | 70,769 | 761,346 | 9.30 | 53,089 | 534,216 | 9.94 |
| **2012** | 236,711 | 5,574,194 | 4.25 | 9,147 | 1,683,388 | 0.54 | 30,979 | 1,398,626 | 2.21 | 67,261 | 1,174,152 | 5.73 | 73,863 | 775,205 | 9.53 | 55,461 | 542,823 | 10.22 |
| **2013** | 246,556 | 5,615,499 | 4.39 | 9,776 | 1,662,874 | 0.59 | 32,791 | 1,434,743 | 2.29 | 69,955 | 1,185,601 | 5.90 | 77,522 | 793,007 | 9.78 | 56,512 | 539,274 | 10.48 |
| **2014** | 255,499 | 5,674,357 | 4.50 | 9,880 | 1,644,009 | 0.60 | 34,613 | 1,477,327 | 2.34 | 71,454 | 1,188,473 | 6.01 | 81,020 | 818,417 | 9.90 | 58,532 | 546,131 | 10.72 |
| **2015** | 265,102 | 5,794,004 | 4.58 | 10,219 | 1,642,197 | 0.62 | 36,509 | 1,539,394 | 2.37 | 74,193 | 1,216,002 | 6.10 | 84,245 | 840,876 | 10.02 | 59,936 | 555,535 | 10.79 |
| **2016** | 275,752 | 5,925,074 | 4.65 | 10,193 | 1,645,845 | 0.62 | 38,551 | 1,595,887 | 2.42 | 75,270 | 1,228,739 | 6.13 | 89,182 | 883,962 | 10.09 | 62,556 | 570,641 | 10.96 |
| **2017** | 286,643 | 6,043,281 | 4.74 | 10,550 | 1,650,649 | 0.64 | 40,524 | 1,643,746 | 2.47 | 75,811 | 1,231,141 | 6.16 | 94,672 | 935,479 | 10.12 | 65,086 | 582,266 | 11.18 |
| **2018** | 296,203 | 6,151,681 | 4.81 | 10,454 | 1,658,806 | 0.63 | 42,463 | 1,682,340 | 2.52 | 77,192 | 1,248,511 | 6.18 | 98,361 | 967,791 | 10.16 | 67,733 | 594,233 | 11.40 |
| **2019** | 301,669 | 6,159,496 | 4.90 | 11,364 | 1,646,265 | 0.69 | 43,619 | 1,686,564 | 2.59 | 77,556 | 1,250,031 | 6.20 | 99,838 | 977,206 | 10.22 | 69,292 | 599,430 | 11.56 |

**Table S5.** Prevalence of potentially undiagnosed COPD stratified by age. First column shows whole cohort COPD definition used.

| **Year** | **Smoker with symptoms, inhaler, no asthma w/o validated COPD [Definition 3 minus Definition 1]** | | | **Age: 40-49 years** | | | **Age: 50-59 years** | | | **Age: 60-69 years** | | | **Age: 70-79 years** | | | **Age: 80+ years** | | |
| --- | --- | --- | --- | --- | --- | --- | --- | --- | --- | --- | --- | --- | --- | --- | --- | --- | --- | --- |
| Numerator | Denominator | Prevalence (%) | Numerator | Denominator | Prevalence (%) | Numerator | Denominator | Prevalence (%) | Numerator | Denominator | Prevalence (%) | Numerator | Denominator | Prevalence (%) | Numerator | Denominator | Prevalence (%) |
| **2000** | 7,777 | 4,373,538 | 0.18 | 1,127 | 1,246,120 | 0.09 | 2,016 | 1,152,809 | 0.17 | 2,305 | 864,376 | 0.27 | 1,772 | 699,669 | 0.25 | 557 | 410,564 | 0.14 |
| **2001** | 10,497 | 4,518,781 | 0.23 | 1,502 | 1,301,536 | 0.12 | 2,778 | 1,196,128 | 0.23 | 3,022 | 878,559 | 0.34 | 2,359 | 707,700 | 0.33 | 836 | 434,858 | 0.19 |
| **2002** | 13,686 | 4,632,781 | 0.30 | 1,944 | 1,351,608 | 0.14 | 3,587 | 1,221,139 | 0.29 | 3,841 | 897,067 | 0.43 | 3,176 | 712,606 | 0.45 | 1,138 | 450,361 | 0.25 |
| **2003** | 17,453 | 4,754,059 | 0.37 | 2,395 | 1,404,646 | 0.17 | 4,527 | 1,243,359 | 0.36 | 4,873 | 925,430 | 0.53 | 4,111 | 716,305 | 0.57 | 1,547 | 464,319 | 0.33 |
| **2004** | 21,096 | 4,857,026 | 0.43 | 2,847 | 1,459,507 | 0.20 | 5,272 | 1,252,314 | 0.42 | 5,941 | 954,578 | 0.62 | 4,983 | 719,312 | 0.69 | 2,053 | 471,315 | 0.44 |
| **2005** | 25,339 | 4,948,299 | 0.51 | 3,527 | 1,507,832 | 0.23 | 6,262 | 1,268,816 | 0.49 | 6,961 | 972,242 | 0.72 | 5,956 | 722,428 | 0.82 | 2,633 | 476,981 | 0.55 |
| **2006** | 29,908 | 5,043,840 | 0.59 | 4,166 | 1,549,925 | 0.27 | 7,042 | 1,269,522 | 0.55 | 8,280 | 1,009,105 | 0.82 | 6,963 | 728,474 | 0.96 | 3,457 | 486,814 | 0.71 |
| **2007** | 34,702 | 5,134,952 | 0.68 | 4,808 | 1,584,668 | 0.30 | 7,792 | 1,260,560 | 0.62 | 9,679 | 1,056,042 | 0.92 | 8,191 | 737,818 | 1.11 | 4,232 | 495,864 | 0.85 |
| **2008** | 40,497 | 5,238,538 | 0.77 | 5,576 | 1,620,295 | 0.34 | 8,970 | 1,273,941 | 0.70 | 11,152 | 1,089,120 | 1.02 | 9,537 | 748,508 | 1.27 | 5,262 | 506,674 | 1.04 |
| **2009** | 48,402 | 5,340,210 | 0.91 | 6,784 | 1,653,172 | 0.41 | 10,361 | 1,296,783 | 0.80 | 13,301 | 1,116,984 | 1.19 | 11,277 | 758,190 | 1.49 | 6,679 | 515,081 | 1.30 |
| **2010** | 56,658 | 5,415,934 | 1.05 | 8,284 | 1,669,968 | 0.50 | 12,134 | 1,325,464 | 0.92 | 15,403 | 1,137,506 | 1.35 | 12,800 | 758,555 | 1.69 | 8,037 | 524,441 | 1.53 |
| **2011** | 64,513 | 5,489,639 | 1.18 | 9,602 | 1,677,590 | 0.57 | 13,985 | 1,357,282 | 1.03 | 17,232 | 1,159,205 | 1.49 | 14,217 | 761,346 | 1.87 | 9,477 | 534,216 | 1.77 |
| **2012** | 72,374 | 5,574,194 | 1.30 | 10,848 | 1,683,388 | 0.64 | 15,840 | 1,398,626 | 1.13 | 19,146 | 1,174,152 | 1.63 | 15,791 | 775,205 | 2.04 | 10,749 | 542,823 | 1.98 |
| **2013** | 80,355 | 5,615,499 | 1.43 | 12,118 | 1,662,874 | 0.73 | 17,892 | 1,434,743 | 1.25 | 21,026 | 1,185,601 | 1.77 | 17,459 | 793,007 | 2.20 | 11,860 | 539,274 | 2.20 |
| **2014** | 87,326 | 5,674,357 | 1.54 | 12,759 | 1,644,009 | 0.78 | 19,892 | 1,477,327 | 1.35 | 22,404 | 1,188,473 | 1.89 | 19,429 | 818,417 | 2.37 | 12,842 | 546,131 | 2.35 |
| **2015** | 94,478 | 5,794,004 | 1.63 | 13,400 | 1,642,197 | 0.82 | 21,985 | 1,539,394 | 1.43 | 24,175 | 1,216,002 | 1.99 | 21,043 | 840,876 | 2.50 | 13,875 | 555,535 | 2.50 |
| **2016** | 100,488 | 5,925,074 | 1.70 | 13,658 | 1,645,845 | 0.83 | 23,904 | 1,595,887 | 1.50 | 25,085 | 1,228,739 | 2.04 | 22,853 | 883,962 | 2.59 | 14,988 | 570,641 | 2.63 |
| **2017** | 106,788 | 6,043,281 | 1.77 | 13,930 | 1,650,649 | 0.84 | 25,828 | 1,643,746 | 1.57 | 26,117 | 1,231,141 | 2.12 | 24,859 | 935,479 | 2.66 | 16,054 | 582,266 | 2.76 |
| **2018** | 113,231 | 6,151,681 | 1.84 | 14,155 | 1,658,806 | 0.85 | 27,882 | 1,682,340 | 1.66 | 27,452 | 1,248,511 | 2.20 | 26,466 | 967,791 | 2.73 | 17,276 | 594,233 | 2.91 |
| **2019** | 116,976 | 6,159,496 | 1.90 | 13,733 | 1,646,265 | 0.83 | 29,407 | 1,686,564 | 1.74 | 28,120 | 1,250,031 | 2.25 | 27,590 | 977,206 | 2.82 | 18,126 | 599,430 | 3.02 |

**Table S6.** Prevalence of COPD stratified by region. First column shows whole cohort COPD definition used.

| **Year** | **Validated OR HES (1st / 2nd) COPD [Definition 1 OR Definition 5]** | | | **Region: North East** | | | **Region: North West** | | | **Region: Yorkshire And The Humber** | | | **Region: East Midlands** | | | **Region: West Midlands** | | | **Region: East of England** | | | **Region: South West** | | | **Region: South Central** | | | **Region: London** | | | **Region: South East Coast** | | |
| --- | --- | --- | --- | --- | --- | --- | --- | --- | --- | --- | --- | --- | --- | --- | --- | --- | --- | --- | --- | --- | --- | --- | --- | --- | --- | --- | --- | --- | --- | --- | --- | --- | --- |
| Numerator | Denominator | Prevalence (%) | Numerator | Denominator | Prevalence (%) | Numerator | Denominator | Prevalence (%) | Numerator | Denominator | Prevalence (%) | Numerator | Denominator | Prevalence (%) | Numerator | Denominator | Prevalence (%) | Numerator | Denominator | Prevalence (%) | Numerator | Denominator | Prevalence (%) | Numerator | Denominator | Prevalence (%) | Numerator | Denominator | Prevalence (%) | Numerator | Denominator | Prevalence (%) |
| **2000** | 82,212 | 4,373,538 | 1.88 | 5,331 | 158,806 | 3.36 | 21,130 | 821,858 | 2.57 | 3,508 | 159,910 | 2.19 | 2,075 | 103,338 | 2.01 | 12,561 | 742,029 | 1.69 | 2,911 | 204,021 | 1.43 | 11,056 | 569,773 | 1.94 | 7,043 | 517,087 | 1.36 | 10,540 | 692,571 | 1.52 | 5,963 | 400,169 | 1.49 |
| **2001** | 93,628 | 4,518,781 | 2.07 | 6,073 | 163,701 | 3.71 | 24,031 | 855,272 | 2.81 | 4,049 | 164,719 | 2.46 | 2,293 | 106,274 | 2.16 | 14,284 | 764,028 | 1.87 | 3,307 | 213,406 | 1.55 | 12,402 | 585,733 | 2.12 | 8,270 | 531,795 | 1.56 | 11,934 | 716,991 | 1.66 | 6,864 | 412,537 | 1.66 |
| **2002** | 104,052 | 4,632,781 | 2.25 | 6,528 | 166,902 | 3.91 | 26,812 | 876,281 | 3.06 | 4,532 | 168,653 | 2.69 | 2,591 | 109,637 | 2.36 | 16,017 | 787,737 | 2.03 | 3,732 | 219,252 | 1.70 | 13,506 | 599,080 | 2.25 | 9,233 | 543,878 | 1.70 | 13,374 | 735,819 | 1.82 | 7,597 | 421,236 | 1.80 |
| **2003** | 115,361 | 4,754,059 | 2.43 | 7,021 | 169,655 | 4.14 | 29,853 | 904,655 | 3.30 | 5,084 | 175,546 | 2.90 | 2,763 | 111,456 | 2.48 | 17,940 | 810,092 | 2.21 | 4,126 | 225,430 | 1.83 | 14,840 | 613,355 | 2.42 | 10,255 | 557,588 | 1.84 | 14,724 | 753,070 | 1.96 | 8,606 | 428,788 | 2.01 |
| **2004** | 128,243 | 4,857,026 | 2.64 | 7,668 | 173,250 | 4.43 | 32,845 | 926,913 | 3.54 | 5,647 | 181,070 | 3.12 | 3,023 | 109,864 | 2.75 | 20,128 | 824,528 | 2.44 | 4,723 | 230,935 | 2.05 | 16,380 | 627,647 | 2.61 | 11,684 | 575,907 | 2.03 | 16,130 | 765,629 | 2.11 | 9,852 | 436,886 | 2.26 |
| **2005** | 145,114 | 4,948,299 | 2.93 | 8,576 | 176,392 | 4.86 | 37,167 | 951,040 | 3.91 | 6,304 | 185,695 | 3.39 | 3,451 | 110,650 | 3.12 | 22,606 | 836,003 | 2.70 | 5,417 | 238,312 | 2.27 | 18,529 | 641,781 | 2.89 | 13,429 | 590,134 | 2.28 | 18,230 | 771,092 | 2.36 | 11,244 | 443,120 | 2.54 |
| **2006** | 159,473 | 5,043,840 | 3.16 | 9,293 | 179,911 | 5.17 | 40,252 | 969,288 | 4.15 | 6,780 | 189,973 | 3.57 | 3,723 | 113,724 | 3.27 | 25,415 | 855,093 | 2.97 | 6,004 | 244,250 | 2.46 | 20,523 | 652,909 | 3.14 | 14,789 | 606,055 | 2.44 | 20,057 | 778,944 | 2.57 | 12,469 | 449,931 | 2.77 |
| **2007** | 173,231 | 5,134,952 | 3.37 | 10,038 | 183,145 | 5.48 | 43,144 | 983,339 | 4.39 | 7,181 | 193,570 | 3.71 | 4,028 | 115,824 | 3.48 | 27,858 | 870,815 | 3.20 | 6,634 | 249,652 | 2.66 | 22,467 | 663,276 | 3.39 | 16,058 | 622,344 | 2.58 | 21,970 | 793,423 | 2.77 | 13,688 | 456,087 | 3.00 |
| **2008** | 186,569 | 5,238,538 | 3.56 | 10,602 | 186,071 | 5.70 | 46,185 | 1,001,076 | 4.61 | 7,622 | 197,264 | 3.86 | 4,305 | 118,737 | 3.63 | 30,314 | 887,912 | 3.41 | 7,231 | 256,199 | 2.82 | 24,167 | 676,792 | 3.57 | 17,340 | 637,249 | 2.72 | 23,752 | 809,515 | 2.93 | 14,888 | 464,579 | 3.20 |
| **2009** | 200,042 | 5,340,210 | 3.75 | 11,154 | 188,879 | 5.91 | 48,944 | 1,016,823 | 4.81 | 8,190 | 201,574 | 4.06 | 4,599 | 121,969 | 3.77 | 32,649 | 901,980 | 3.62 | 7,901 | 263,097 | 3.00 | 25,886 | 691,031 | 3.75 | 18,933 | 653,903 | 2.90 | 25,732 | 824,077 | 3.12 | 15,925 | 474,772 | 3.35 |
| **2010** | 212,602 | 5,415,934 | 3.93 | 11,673 | 191,563 | 6.09 | 51,522 | 1,025,288 | 5.03 | 8,663 | 204,303 | 4.24 | 4,957 | 124,711 | 3.97 | 34,541 | 910,537 | 3.79 | 8,417 | 267,307 | 3.15 | 27,488 | 698,766 | 3.93 | 20,322 | 665,560 | 3.05 | 27,816 | 844,285 | 3.29 | 17,090 | 481,762 | 3.55 |
| **2011** | 225,671 | 5,489,639 | 4.11 | 12,197 | 193,870 | 6.29 | 54,205 | 1,039,443 | 5.21 | 9,066 | 206,397 | 4.39 | 5,275 | 126,844 | 4.16 | 36,633 | 920,722 | 3.98 | 9,639 | 271,181 | 3.55 | 28,894 | 708,632 | 4.08 | 21,702 | 676,358 | 3.21 | 29,734 | 855,476 | 3.48 | 18,214 | 489,154 | 3.72 |
| **2012** | 236,711 | 5,574,194 | 4.25 | 12,801 | 196,537 | 6.51 | 56,448 | 1,050,864 | 5.37 | 9,418 | 209,290 | 4.50 | 5,555 | 129,114 | 4.30 | 38,344 | 934,036 | 4.11 | 10,229 | 276,148 | 3.70 | 30,295 | 717,881 | 4.22 | 23,011 | 686,686 | 3.35 | 31,461 | 876,680 | 3.59 | 19,072 | 495,748 | 3.85 |
| **2013** | 246,556 | 5,615,499 | 4.39 | 13,139 | 197,404 | 6.66 | 58,350 | 1,053,453 | 5.54 | 9,738 | 210,164 | 4.63 | 5,767 | 130,412 | 4.42 | 39,736 | 941,737 | 4.22 | 10,492 | 280,286 | 3.74 | 32,398 | 719,299 | 4.50 | 24,134 | 694,884 | 3.47 | 32,842 | 883,412 | 3.72 | 19,924 | 503,586 | 3.96 |
| **2014** | 255,499 | 5,674,357 | 4.50 | 13,427 | 198,865 | 6.75 | 60,007 | 1,058,414 | 5.67 | 10,028 | 212,492 | 4.72 | 6,001 | 131,537 | 4.56 | 41,292 | 949,772 | 4.35 | 10,676 | 283,319 | 3.77 | 33,923 | 719,787 | 4.71 | 25,096 | 703,389 | 3.57 | 34,233 | 904,734 | 3.78 | 20,803 | 511,407 | 4.07 |
| **2015** | 265,102 | 5,794,004 | 4.58 | 13,781 | 200,079 | 6.89 | 61,987 | 1,075,567 | 5.76 | 10,441 | 217,553 | 4.80 | 6,265 | 134,585 | 4.66 | 43,092 | 973,476 | 4.43 | 10,889 | 287,830 | 3.78 | 34,968 | 728,368 | 4.80 | 26,144 | 717,336 | 3.64 | 35,837 | 938,562 | 3.82 | 21,683 | 520,010 | 4.17 |
| **2016** | 275,752 | 5,925,074 | 4.65 | 14,045 | 201,600 | 6.97 | 63,948 | 1,090,729 | 5.86 | 10,973 | 222,737 | 4.93 | 6,544 | 139,714 | 4.68 | 45,081 | 995,181 | 4.53 | 11,673 | 294,728 | 3.96 | 35,845 | 734,250 | 4.88 | 27,511 | 732,161 | 3.76 | 37,472 | 985,655 | 3.80 | 22,646 | 527,680 | 4.29 |
| **2017** | 286,643 | 6,043,281 | 4.74 | 14,369 | 203,131 | 7.07 | 65,895 | 1,102,723 | 5.98 | 11,429 | 226,848 | 5.04 | 6,740 | 142,399 | 4.73 | 46,509 | 1,007,246 | 4.62 | 12,168 | 299,794 | 4.06 | 36,907 | 744,932 | 4.95 | 28,547 | 744,124 | 3.84 | 40,553 | 1,035,824 | 3.92 | 23,511 | 535,632 | 4.39 |
| **2018** | 296,203 | 6,151,681 | 4.81 | 14,512 | 204,765 | 7.09 | 67,819 | 1,114,829 | 6.08 | 11,871 | 229,673 | 5.17 | 6,922 | 145,702 | 4.75 | 49,313 | 1,024,011 | 4.82 | 11,995 | 298,316 | 4.02 | 37,998 | 753,673 | 5.04 | 29,421 | 755,918 | 3.89 | 42,234 | 1,079,862 | 3.91 | 24,101 | 544,314 | 4.43 |
| **2019** | 301,669 | 6,159,496 | 4.90 | 14,388 | 200,656 | 7.17 | 69,293 | 1,122,155 | 6.17 | 11,188 | 211,415 | 5.29 | 6,538 | 134,326 | 4.87 | 52,962 | 1,024,998 | 5.17 | 11,930 | 296,165 | 4.03 | 37,998 | 749,330 | 5.07 | 30,173 | 763,782 | 3.95 | 42,713 | 1,109,797 | 3.85 | 24,484 | 546,856 | 4.48 |

**Table S7.** Prevalence of potentially undiagnosed COPD stratified by region. First column shows whole cohort COPD definition used.

| **Year** | **Smoker with symptoms, inhaler, no asthma w/o validated COPD [Definition 3 minus Definition 1]** | | | **Region: North East** | | | **Region: North West** | | | **Region: Yorkshire And The Humber** | | | **Region: East Midlands** | | | **Region: West Midlands** | | | **Region: East of England** | | | **Region: South West** | | | **Region: South Central** | | | **Region: London** | | | **Region: South East Coast** | | |
| --- | --- | --- | --- | --- | --- | --- | --- | --- | --- | --- | --- | --- | --- | --- | --- | --- | --- | --- | --- | --- | --- | --- | --- | --- | --- | --- | --- | --- | --- | --- | --- | --- | --- |
| Numerator | Denominator | Prevalence (%) | Numerator | Denominator | Prevalence (%) | Numerator | Denominator | Prevalence (%) | Numerator | Denominator | Prevalence (%) | Numerator | Denominator | Prevalence (%) | Numerator | Denominator | Prevalence (%) | Numerator | Denominator | Prevalence (%) | Numerator | Denominator | Prevalence (%) | Numerator | Denominator | Prevalence (%) | Numerator | Denominator | Prevalence (%) | Numerator | Denominator | Prevalence (%) |
| **2000** | 7,777 | 4,373,538 | 0.18 | 257 | 158,806 | 0.16 | 1,619 | 821,858 | 0.20 | 284 | 159,910 | 0.18 | 158 | 103,338 | 0.15 | 1,192 | 742,029 | 0.16 | 474 | 204,021 | 0.23 | 890 | 569,773 | 0.16 | 877 | 517,087 | 0.17 | 1,241 | 692,571 | 0.18 | 778 | 400,169 | 0.19 |
| **2001** | 10,497 | 4,518,781 | 0.23 | 321 | 163,701 | 0.20 | 2,247 | 855,272 | 0.26 | 367 | 164,719 | 0.22 | 199 | 106,274 | 0.19 | 1,617 | 764,028 | 0.21 | 641 | 213,406 | 0.30 | 1,190 | 585,733 | 0.20 | 1,267 | 531,795 | 0.24 | 1,629 | 716,991 | 0.23 | 1,009 | 412,537 | 0.24 |
| **2002** | 13,686 | 4,632,781 | 0.30 | 450 | 166,902 | 0.27 | 2,925 | 876,281 | 0.33 | 494 | 168,653 | 0.29 | 307 | 109,637 | 0.28 | 2,163 | 787,737 | 0.27 | 820 | 219,252 | 0.37 | 1,538 | 599,080 | 0.26 | 1,649 | 543,878 | 0.30 | 2,094 | 735,819 | 0.28 | 1,234 | 421,236 | 0.29 |
| **2003** | 17,453 | 4,754,059 | 0.37 | 668 | 169,655 | 0.39 | 3,692 | 904,655 | 0.41 | 643 | 175,546 | 0.37 | 384 | 111,456 | 0.34 | 2,701 | 810,092 | 0.33 | 1,054 | 225,430 | 0.47 | 1,910 | 613,355 | 0.31 | 2,162 | 557,588 | 0.39 | 2,658 | 753,070 | 0.35 | 1,569 | 428,788 | 0.37 |
| **2004** | 21,096 | 4,857,026 | 0.43 | 816 | 173,250 | 0.47 | 4,392 | 926,913 | 0.47 | 787 | 181,070 | 0.43 | 460 | 109,864 | 0.42 | 3,329 | 824,528 | 0.40 | 1,298 | 230,935 | 0.56 | 2,347 | 627,647 | 0.37 | 2,611 | 575,907 | 0.45 | 3,225 | 765,629 | 0.42 | 1,821 | 436,886 | 0.42 |
| **2005** | 25,339 | 4,948,299 | 0.51 | 935 | 176,392 | 0.53 | 5,176 | 951,040 | 0.54 | 960 | 185,695 | 0.52 | 549 | 110,650 | 0.50 | 4,122 | 836,003 | 0.49 | 1,572 | 238,312 | 0.66 | 2,854 | 641,781 | 0.44 | 3,077 | 590,134 | 0.52 | 3,894 | 771,092 | 0.50 | 2,188 | 443,120 | 0.49 |
| **2006** | 29,908 | 5,043,840 | 0.59 | 1,093 | 179,911 | 0.61 | 5,951 | 969,288 | 0.61 | 1,168 | 189,973 | 0.61 | 629 | 113,724 | 0.55 | 4,828 | 855,093 | 0.56 | 1,875 | 244,250 | 0.77 | 3,455 | 652,909 | 0.53 | 3,634 | 606,055 | 0.60 | 4,664 | 778,944 | 0.60 | 2,601 | 449,931 | 0.58 |
| **2007** | 34,702 | 5,134,952 | 0.68 | 1,214 | 183,145 | 0.66 | 6,958 | 983,339 | 0.71 | 1,335 | 193,570 | 0.69 | 721 | 115,824 | 0.62 | 5,554 | 870,815 | 0.64 | 2,090 | 249,652 | 0.84 | 4,007 | 663,276 | 0.60 | 4,279 | 622,344 | 0.69 | 5,470 | 793,423 | 0.69 | 3,064 | 456,087 | 0.67 |
| **2008** | 40,497 | 5,238,538 | 0.77 | 1,348 | 186,071 | 0.72 | 8,002 | 1,001,076 | 0.80 | 1,529 | 197,264 | 0.78 | 795 | 118,737 | 0.67 | 6,522 | 887,912 | 0.73 | 2,477 | 256,199 | 0.97 | 4,848 | 676,792 | 0.72 | 5,044 | 637,249 | 0.79 | 6,311 | 809,515 | 0.78 | 3,609 | 464,579 | 0.78 |
| **2009** | 48,402 | 5,340,210 | 0.91 | 1,556 | 188,879 | 0.82 | 9,380 | 1,016,823 | 0.92 | 1,753 | 201,574 | 0.87 | 911 | 121,969 | 0.75 | 7,821 | 901,980 | 0.87 | 3,017 | 263,097 | 1.15 | 5,853 | 691,031 | 0.85 | 6,090 | 653,903 | 0.93 | 7,557 | 824,077 | 0.92 | 4,453 | 474,772 | 0.94 |
| **2010** | 56,658 | 5,415,934 | 1.05 | 1,831 | 191,563 | 0.96 | 10,862 | 1,025,288 | 1.06 | 1,984 | 204,303 | 0.97 | 1,006 | 124,711 | 0.81 | 9,018 | 910,537 | 0.99 | 3,528 | 267,307 | 1.32 | 6,918 | 698,766 | 0.99 | 7,216 | 665,560 | 1.08 | 8,962 | 844,285 | 1.06 | 5,322 | 481,762 | 1.10 |
| **2011** | 64,513 | 5,489,639 | 1.18 | 2,034 | 193,870 | 1.05 | 12,069 | 1,039,443 | 1.16 | 2,188 | 206,397 | 1.06 | 1,144 | 126,844 | 0.90 | 10,190 | 920,722 | 1.11 | 4,019 | 271,181 | 1.48 | 7,905 | 708,632 | 1.12 | 8,306 | 676,358 | 1.23 | 10,393 | 855,476 | 1.21 | 6,254 | 489,154 | 1.28 |
| **2012** | 72,374 | 5,574,194 | 1.30 | 2,187 | 196,537 | 1.11 | 13,181 | 1,050,864 | 1.25 | 2,431 | 209,290 | 1.16 | 1,236 | 129,114 | 0.96 | 11,435 | 934,036 | 1.22 | 4,597 | 276,148 | 1.66 | 8,963 | 717,881 | 1.25 | 9,487 | 686,686 | 1.38 | 11,689 | 876,680 | 1.33 | 7,156 | 495,748 | 1.44 |
| **2013** | 80,355 | 5,615,499 | 1.43 | 2,431 | 197,404 | 1.23 | 14,467 | 1,053,453 | 1.37 | 2,621 | 210,164 | 1.25 | 1,358 | 130,412 | 1.04 | 12,681 | 941,737 | 1.35 | 5,219 | 280,286 | 1.86 | 9,891 | 719,299 | 1.38 | 10,561 | 694,884 | 1.52 | 13,162 | 883,412 | 1.49 | 7,960 | 503,586 | 1.58 |
| **2014** | 87,326 | 5,674,357 | 1.54 | 2,609 | 198,865 | 1.31 | 15,542 | 1,058,414 | 1.47 | 2,830 | 212,492 | 1.33 | 1,458 | 131,537 | 1.11 | 13,713 | 949,772 | 1.44 | 5,749 | 283,319 | 2.03 | 10,770 | 719,787 | 1.50 | 11,593 | 703,389 | 1.65 | 14,346 | 904,734 | 1.59 | 8,714 | 511,407 | 1.70 |
| **2015** | 94,478 | 5,794,004 | 1.63 | 2,764 | 200,079 | 1.38 | 16,710 | 1,075,567 | 1.55 | 3,071 | 217,553 | 1.41 | 1,515 | 134,585 | 1.13 | 14,942 | 973,476 | 1.53 | 6,147 | 287,830 | 2.14 | 11,646 | 728,368 | 1.60 | 12,510 | 717,336 | 1.74 | 15,632 | 938,562 | 1.67 | 9,537 | 520,010 | 1.83 |
| **2016** | 100,488 | 5,925,074 | 1.70 | 2,927 | 201,600 | 1.45 | 17,740 | 1,090,729 | 1.63 | 3,227 | 222,737 | 1.45 | 1,622 | 139,714 | 1.16 | 15,788 | 995,181 | 1.59 | 6,384 | 294,728 | 2.17 | 12,381 | 734,250 | 1.69 | 13,334 | 732,161 | 1.82 | 17,041 | 985,655 | 1.73 | 10,040 | 527,680 | 1.90 |
| **2017** | 106,788 | 6,043,281 | 1.77 | 3,061 | 203,131 | 1.51 | 18,726 | 1,102,723 | 1.70 | 3,415 | 226,848 | 1.51 | 1,713 | 142,399 | 1.20 | 16,801 | 1,007,246 | 1.67 | 6,748 | 299,794 | 2.25 | 13,151 | 744,932 | 1.77 | 14,271 | 744,124 | 1.92 | 18,318 | 1,035,824 | 1.77 | 10,580 | 535,632 | 1.98 |
| **2018** | 113,231 | 6,151,681 | 1.84 | 3,166 | 204,765 | 1.55 | 19,903 | 1,114,829 | 1.79 | 3,561 | 229,673 | 1.55 | 1,857 | 145,702 | 1.27 | 17,616 | 1,024,011 | 1.72 | 7,120 | 298,316 | 2.39 | 14,035 | 753,673 | 1.86 | 15,172 | 755,918 | 2.01 | 19,555 | 1,079,862 | 1.81 | 11,242 | 544,314 | 2.07 |
| **2019** | 116,976 | 6,159,496 | 1.90 | 3,250 | 200,656 | 1.62 | 20,594 | 1,122,155 | 1.84 | 3,384 | 211,415 | 1.60 | 1,774 | 134,326 | 1.32 | 18,205 | 1,024,998 | 1.78 | 7,294 | 296,165 | 2.46 | 14,526 | 749,330 | 1.94 | 15,919 | 763,782 | 2.08 | 20,483 | 1,109,797 | 1.85 | 11,546 | 546,856 | 2.11 |

# Supplementary figures

**Figure S1.** MRC grade of patients with a validated diagnosis of COPD in primary care or primary or secondary diagnosis of COPD in secondary care (Definition 1 OR Definition 5) from 2000 to 2019.

**Figure S2.** Ethnicity of patients with a validated diagnosis of COPD in primary care or primary or secondary diagnosis of COPD in secondary care (Definition 1 OR Definition 5) from 2000 to 2019.

**Figure S3.** GOLD stage of patients with a validated diagnosis of COPD in primary care or primary or secondary diagnosis of COPD in secondary care (Definition 1 OR Definition 5) from 2000 to 2019.

**Figure S4.** Pulmonary rehabilitation status of patients with a validated diagnosis of COPD in primary care or primary or secondary diagnosis of COPD in secondary care (Definition 1 OR Definition 5) from 2000 to 2019.

**Figure S5.** Smoking status of patients with a validated diagnosis of COPD in primary care or primary or secondary diagnosis of COPD in secondary care (Definition 1 OR Definition 5) from 2000 to 2019.

**Figure S6.** Exacerbation count of patients with a validated diagnosis of COPD in primary care or primary or secondary diagnosis of COPD in secondary care (Definition 1 OR Definition 5) from 2000 to 2019.

**Figure S7.** Prescribed inhaled therapy of patients with a validated diagnosis of COPD in primary care or primary or secondary diagnosis of COPD in secondary care (Definition 1 OR Definition 5) from 2000 to 2019.
